# Supplementary material
Source: PubMed Central journal article supplement (PMC4822536)
Supplement: CC-052-C6CC01823H-s001.pdf [file CC-052-C6CC01823H-s001.pdf]

# SUPPORTING INFORMATION

## Enzyme Classification Using Complex Dynamic Hemithioacetal Systems

Yan Zhang,<sup>[a]</sup> H. Surangi N. Jayawardena,<sup>[b]</sup> Mingdi Yan,<sup>\*[a],[b]</sup> and Olof Ramström<sup>\*[a]</sup>

<sup>[a]</sup> KTH - Royal Institute of Technology, Department of Chemistry, Teknikringen 30, S-10044 Stockholm, Sweden

<sup>[b]</sup> Department of Chemistry, University of Massachusetts Lowell, 1 University Ave., Lowell, MA 01854, United States

---

### Contents

|                                                              |   |
|--------------------------------------------------------------|---|
| 1. General                                                   | 1 |
| 2. Generation of complex dynamic system for lipase screening | 1 |
| 3. Reaction system with 3-phenylpropanal                     | 1 |
| 4. Synthesis of compounds 1C and 1D                          | 2 |
| 5. NMR-spectra of compounds 1C and 1D                        | 2 |
| 6. NMR response patterns                                     | 3 |
| 7. Linear discriminant analysis (LDA)                        | 5 |
| 7.1. Factor scores                                           | 7 |
| 7.2. Manova tests and cross-validation                       | 7 |
| 7.3. Cross-validation on grouped dataset                     | 8 |

---

### 1. General

Reagents were obtained from commercial suppliers and used as received. Lipase preparation PSIm was purchased from Amano Enzyme Inc. The other lipases were purchased from Sigma-Aldrich. <sup>1</sup>H-NMR and <sup>13</sup>C-NMR data were recorded on a Bruker Avance 400 (100) MHz and/or a Bruker Avance 500 (125) MHz, respectively. Chemical shifts are reported as  $\delta$  values (ppm) with CDCl<sub>3</sub> (<sup>1</sup>H-NMR  $\delta$  7.26, <sup>13</sup>C-NMR  $\delta$  77.16) as an internal standard. J values are given in Hertz (Hz). High resolution mass spectroscopy was performed by the Instrument Station of National Center for Genetic Engineering and Biotechnology (BIOTEC), Thailand. Thin layer chromatography (TLC) was performed on precoated Polygram<sup>®</sup> SIL G/UV 254 silica plates (0.20 mm, Macherey-Nagel), visualized with UV-detection. Flash column chromatography was performed on silica gel 60, 0.040-0.063 mm (SDS) or neutral aluminum oxide.

**Lipase abbreviations:** *Aspergillus niger* lipase (ANL), *Candida antarctica* lipase A, (CALA), *Candida antarctica* lipase B, (CALB), *Candida rugosa* lipase (CRL), *Mucor javanicus* lipase (MJL), *Mucor miehei* lipase (MML), *Pseudomonas fluorescens* lipase (PFL), porcine pancreas lipase (PPL), *Burkholderia cepacia* lipase (PSCI and PSIm), *Rhizopus arrhizus* lipase (RAL), and *Rhizopus niveus* lipase (RNL).

### 2. Generation of complex dynamic system for lipase screening

Pyridine-2-carbaldehyde, 3-phenylpropanal, butanal, octanal, 2-methylpropanal, 3-methylbutanal, ethyl 2-oxoacetate solution, cyclohexanecarbaldehyde, 2-ethylbutanal (0.1 mmol each), triethylamine (0.1 mmol), methyl 2-sulfanylacetate (0.2 mmol), butane-1-thiol (0.2 mmol), phenyl acetate (0.3 mmol), together with dry toluene (0.6 mL) were mixed in a vial, then transferred into a sealed-cap vial (1.5 mL) containing lipase (5 mg for CALB, 30 mg for CALA, 10 mg for MML, 50 mg for each other lipase) and ground 4 Å molecular sieves (20 mg). The sealed vials were then kept standing at r.t. NMR was used to follow the reaction progress.

### 3. Reaction system with 3-phenylpropanal

3-Phenylpropanal (0.1 mmol), triethylamine (0.1 mmol), methyl 2-sulfanylacetate (0.1 mmol), butane-1-thiol (0.1 mmol), phenyl acetate (0.3 mmol) and dry toluene (0.6 mL) were mixed in a vial, then transferred into a sealed-cap vial (1.5 mL) containing lipase (5 mg for CALB, 50 mg for each other lipase) and ground 4 Å molecular sieves (20 mg). The sealed vials were then kept standing at r.t. <sup>1</sup>H-NMR was used to follow the reaction progress. The reactions were quenched with dilute HCl (1 M), extracted with CH<sub>2</sub>Cl<sub>2</sub> (2 mL  $\times$  3), and the combined organic layer was dried over MgSO<sub>4</sub> and the solvent evaporated. The crude mixture was purified by column chromatography.

#### 4. Synthesis of compounds 1C and 1D

**Methyl 2-((1-acetoxy-3-phenylpropyl)thio)acetate (1C).** Colorless oil.  $^1\text{H-NMR}$  (500 MHz,  $\text{CDCl}_3$ , 25 °C)  $\delta$  2.08 (s, 3H, CH<sub>3</sub>), 2.11-2.25 (m, 2H, CH<sub>2</sub>), 2.74 (t,  $J = 8.3$  Hz, 2H, CH<sub>2</sub>), 3.37 (d,  $J = 16.0$  Hz, 1H, CH<sub>2</sub>), 3.55 (d,  $J = 16.0$  Hz, 1H, CH<sub>2</sub>), 3.72 (s, 3H, CH<sub>3</sub>), 6.02 (t,  $J = 6.8$  Hz, 1H, CH), 7.17 (d,  $J = 7.6$  Hz, 2H, CH), 7.21 (t,  $J = 7.1$  Hz, 1H, CH), 7.29 (t,  $J = 7.6$  Hz, 2H, CH);  $^{13}\text{C-NMR}$  (125 MHz,  $\text{CDCl}_3$ , 25 °C)  $\delta$  21.2, 32.1, 32.9, 36.6, 52.7, 78.9, 126.4, 128.5, 128.7, 140.5, 170.6, 170.7. HRMS: found 305.0818, calc. for  $\text{C}_{14}\text{H}_{18}\text{NaO}_4\text{S}$  [ $\text{M} + \text{Na}^+$ ] 305.0818.

**2-Phenethyl-1,3-oxathiolan-5-one (1D).** Colorless oil.  $^1\text{H-NMR}$  (500 MHz,  $\text{CDCl}_3$ , 25 °C)  $\delta$  2.10-2.19 (m, 1H, CH<sub>2</sub>), 2.29-2.39 (m, 1H, CH<sub>2</sub>), 2.75-2.88 (m, 2H, CH<sub>2</sub>), 3.65 (d,  $J = 16.2$  Hz, 1H, CH<sub>2</sub>), 3.71 (d,  $J = 16.2$  Hz, 1H, CH<sub>2</sub>), 5.46 (t,  $J = 6.2$  Hz, 1H, CH), 7.18-7.25 (m, 3H, CH), 7.36-7.85 (t,  $J = 7.4$  Hz, 2H, CH);  $^{13}\text{C-NMR}$  (125 MHz,  $\text{CDCl}_3$ , 25 °C)  $\delta$  31.5, 31.8, 38.5, 81.5, 126.6, 128.6, 128.8, 139.9, 172.8. HRMS: found 231.0450, calc. for  $\text{C}_{11}\text{H}_{12}\text{NaO}_2\text{S}$  [ $\text{M} + \text{Na}^+$ ] 231.0450.

#### 5. NMR-spectra of compounds 1C and 1D

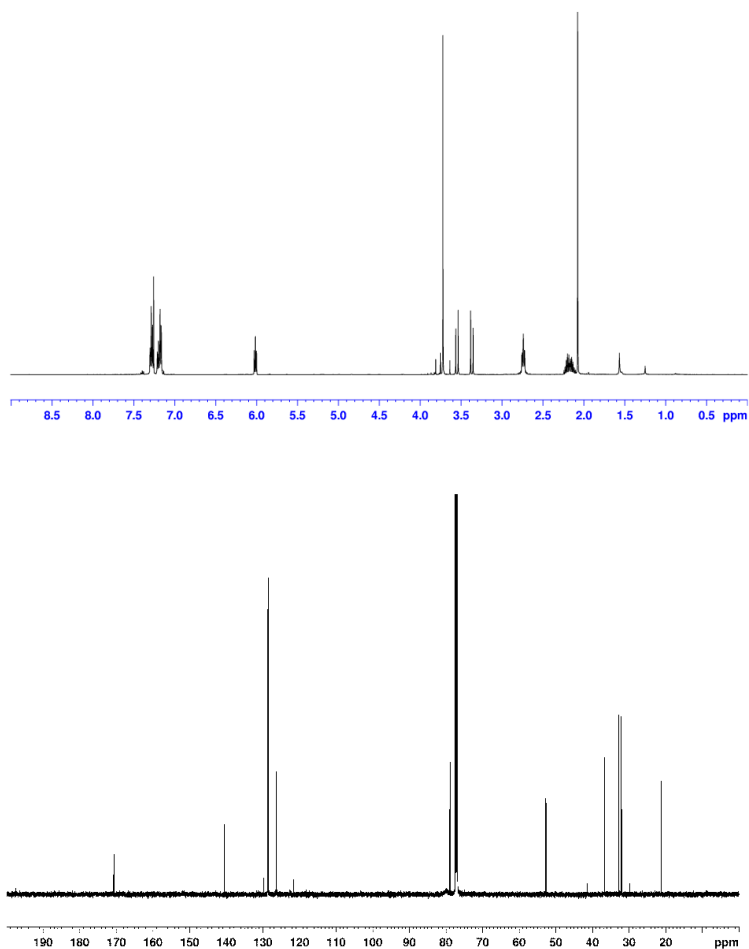

Figure S1.  $^1\text{H-NMR}$  and  $^{13}\text{C-NMR}$  spectra of compound 1C

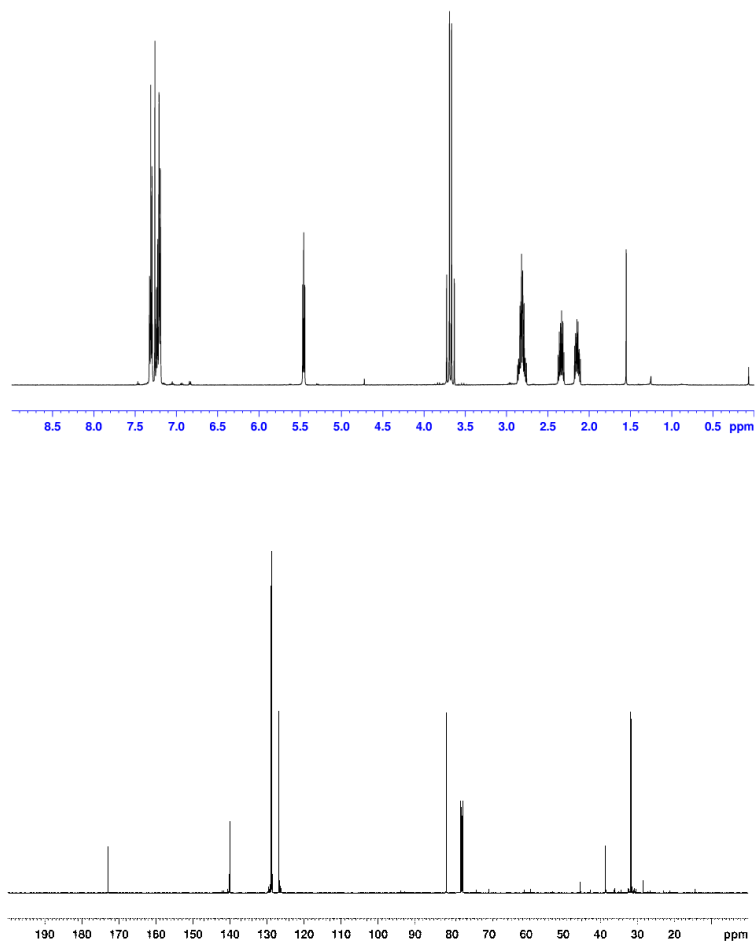

Figure S2.  $^1\text{H}$ -NMR and  $^{13}\text{C}$ -NMR spectra of compound **1D**

## 6. NMR response patterns

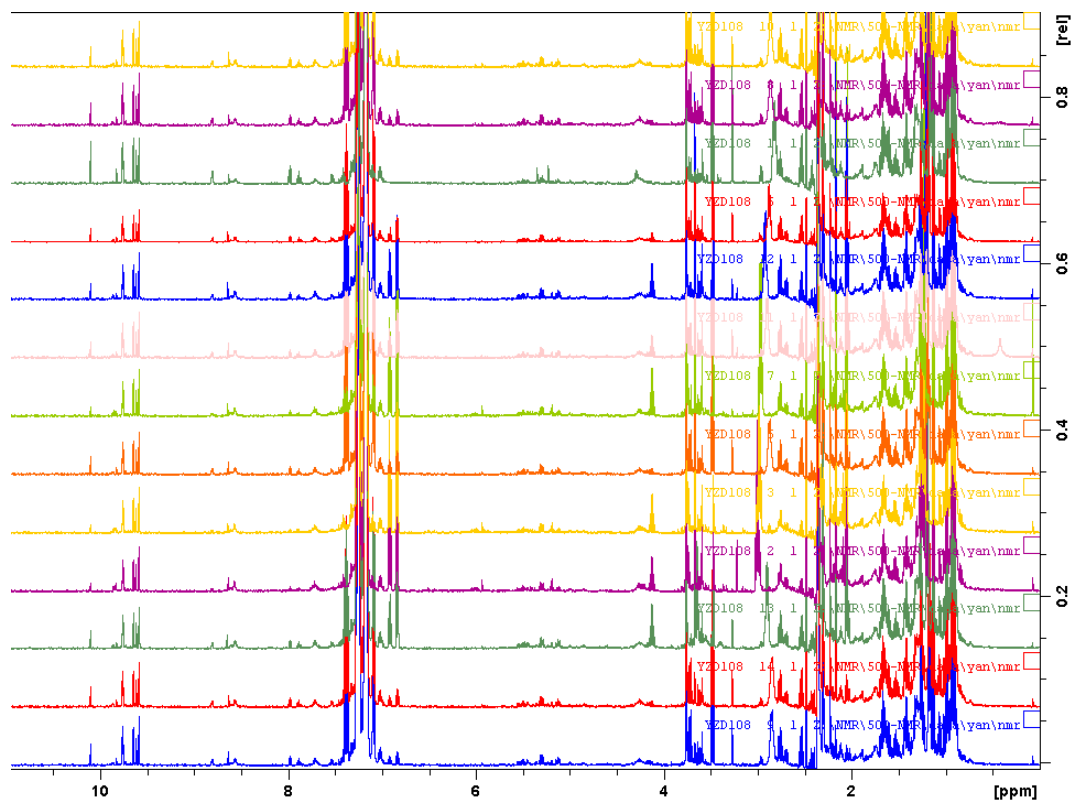

Figure S3.  $^1\text{H}$ -NMR spectra for monitoring the dynamic hemithioacetal systems; full spectra with ANL, CALA, CALB, CRL, MJL, MML, PFL, PPL, PSCI, PSIm, RAL, RNL, probe (from top to bottom)

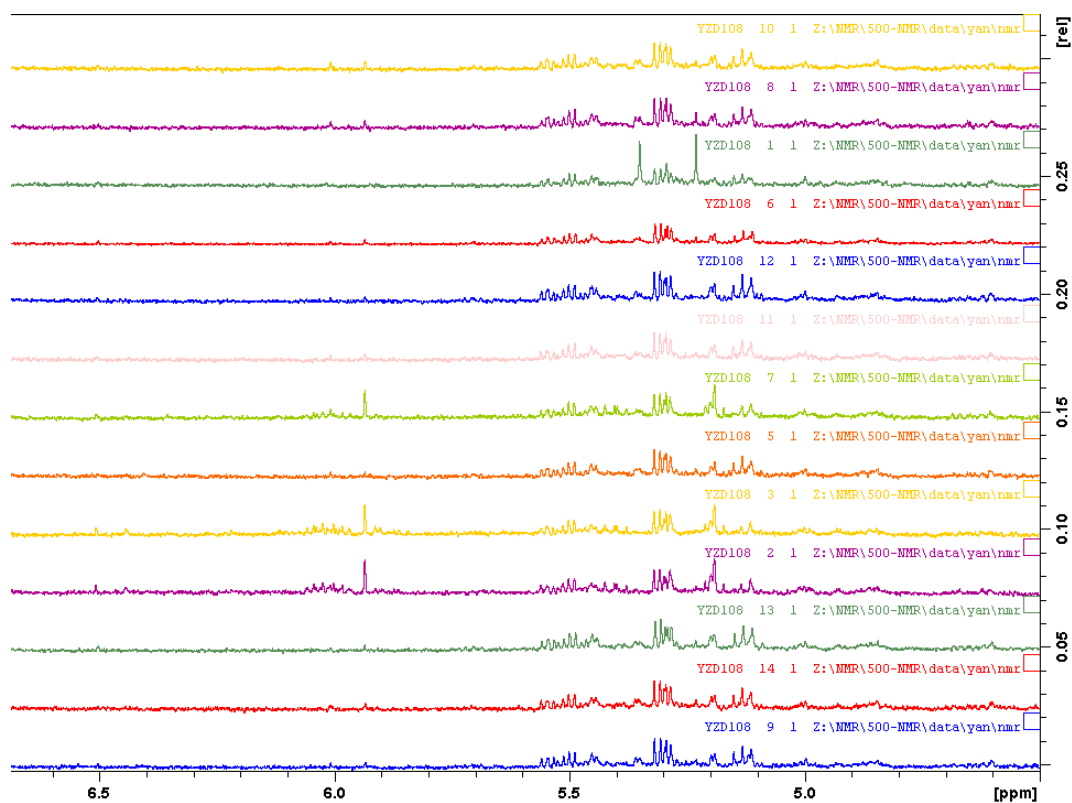

Figure S4. <sup>1</sup>H-NMR spectra for monitoring the dynamic hemithioacetal systems; top) enlarged area with ANL, CALA, CALB, CRL, MJL, MML, PFL, PPL, PSCI, PSIm, RAL, RNL, probe (from top to bottom)

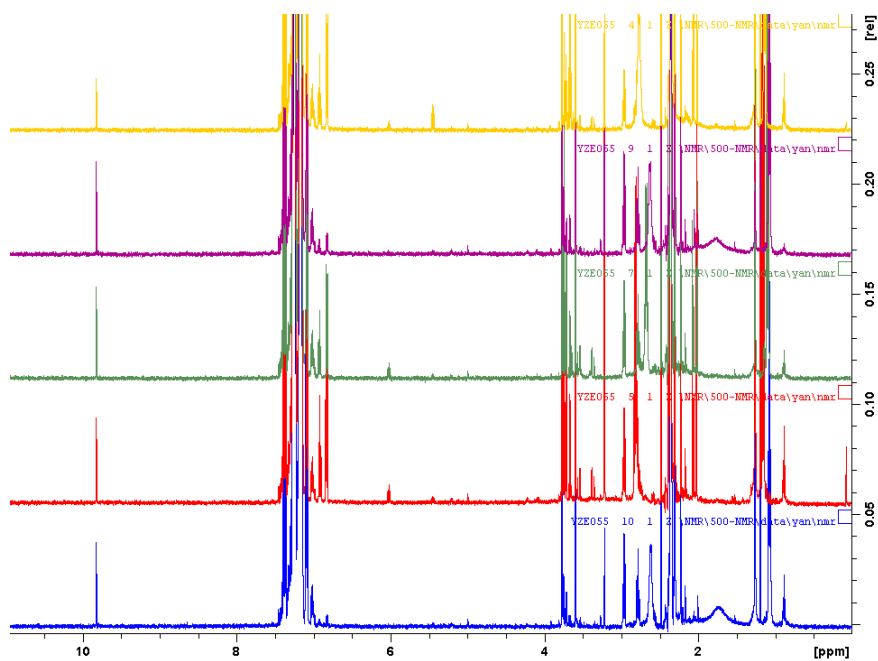

Figure S5. <sup>1</sup>H-NMR spectra for monitoring the reaction system with 3-phenylpropanal using different lipases; full spectra with CALB, CRL, PFL, PSIm, probe (from top to bottom)

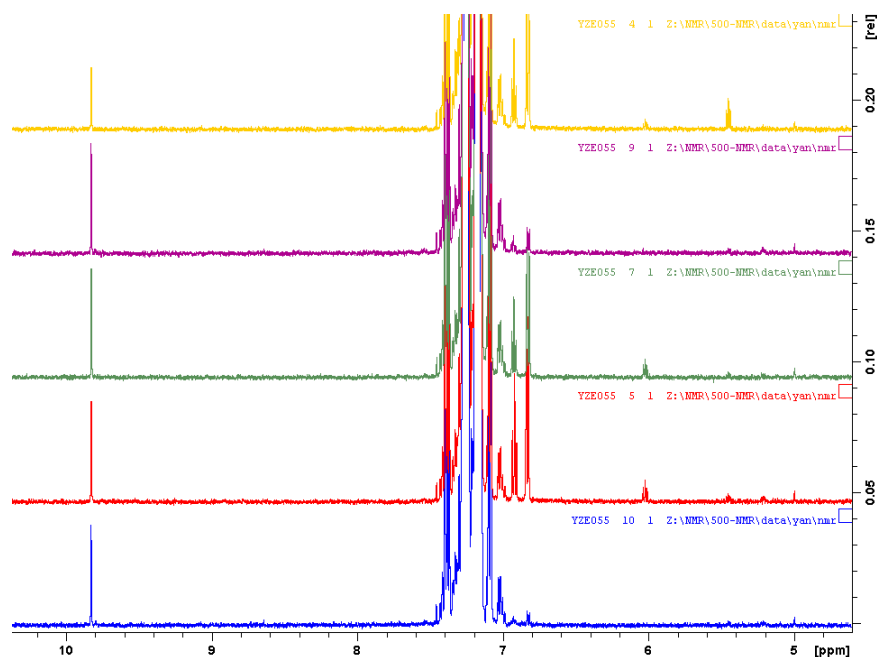

Figure S6.  $^1\text{H}$ -NMR spectra for monitoring the reaction system with 3-phenylpropanal using different lipases; enlarged area with CALB, CRL, PFL, PSlm, probe (from top to bottom)

## 7. Linear discriminant analysis (LDA)

LDA analyses were performed using R (R Core Team, R Foundation For Statistical Computing, Vienna, Austria, 2015), and XLSTAT-Pro statistical analysis software version 2013.1 (Addinsoft, New York, NY) using forward stepwise discrimination. The dependent variables in this case, 12 classes of lipases, were grouped according to the discriminant functions calculated from the explanatory (or predictor) variables. The region from 6.7 - 4.6 ppm of the  $^1\text{H}$ -NMR spectra of the 12 classes of lipases were divided into 21 regions at 0.1 ppm interval, and the integrated NMR intensities at each 0.1 ppm was recorded as explanatory variables. The training matrix (Table S1) was built with the 12 lipases using 21 integrated intensities (I01-I21), where each experiment was done in three replicates. The training matrix was then subjected to LDA analysis, and the factor scores for each of the 12 lipases were calculated (Table S3). Results from manova tests and cross-validation (jackknife) analysis are displayed in Table S5, Table S6, and Table S7. The  $^1\text{H}$ -NMR spectrum of the probe lipase PFL was recorded and processed in the same manner (Table S2). The factor scores calculated by posterior probability (Table S4) were used to predict the classification of the probe lipase. Cross-validation was also performed on the dataset where lipases ANL, CALA, CRL, MJL, MML, PPL, RNL, and RAL were grouped as lipase class LIP. The calculated contingency table and test results are displayed in Table S8 and Table S9, respectively.

Table S1. Training matrix of NMR-response patterns from 6.7 – 4.6 ppm

| Lipase | I01    | I02    | I03    | I04    | I05    | I06    | I07    | I08    | I09    | I10    | I11    | I12    | I13   | I14   | I15   | I16   | I17   | I18   | I19   | I20    | I21   |       |
|--------|--------|--------|--------|--------|--------|--------|--------|--------|--------|--------|--------|--------|-------|-------|-------|-------|-------|-------|-------|--------|-------|-------|
| ANL    | 0.008  | 0.003  | -0.019 | -0.056 | -0.072 | -0.042 | -0.038 | -0.046 | -0.079 | -0.035 | -0.018 | 0.204  | 0.382 | 0.434 | 0.478 | 0.505 | 0.119 | 0.141 | 0.210 | 0.003  | 0.132 |       |
| CALA   | -0.027 | -0.044 | -0.081 | -0.078 | -0.067 | -0.077 | -0.060 | -0.069 | -0.079 | -0.053 | -0.017 | 0.199  | 0.474 | 0.481 | 0.536 | 0.530 | 0.139 | 0.156 | 0.247 | 0.052  | 0.142 |       |
| CALB   | -0.048 | -0.022 | -0.040 | -0.057 | -0.031 | -0.011 | 0.003  | -0.013 | -0.020 | 0.012  | 0.046  | 0.408  | 0.520 | 0.395 | 0.451 | 0.526 | 0.150 | 0.137 | 0.207 | 0.039  | 0.150 |       |
| CRL    | -0.008 | -0.020 | -0.036 | -0.047 | -0.059 | -0.041 | -0.040 | -0.037 | -0.053 | -0.040 | -0.005 | 0.177  | 0.407 | 0.445 | 0.481 | 0.497 | 0.155 | 0.137 | 0.232 | 0.036  | 0.158 |       |
| MJL    | 0.053  | 0.024  | -0.008 | -0.027 | -0.033 | -0.036 | -0.017 | -0.025 | -0.035 | 0.013  | 0.022  | 0.252  | 0.441 | 0.476 | 0.462 | 0.598 | 0.201 | 0.210 | 0.290 | 0.085  | 0.182 |       |
| MML    | -0.005 | -0.029 | -0.035 | -0.054 | -0.060 | -0.060 | -0.043 | -0.065 | -0.038 | -0.058 | -0.030 | -0.009 | 0.211 | 0.415 | 0.464 | 0.458 | 0.499 | 0.158 | 0.156 | 0.220  | 0.037 | 0.162 |
| PFL    | -0.027 | -0.042 | -0.026 | -0.023 | 0.001  | -0.002 | 0.107  | 0.161  | 0.017  | 0.029  | 0.088  | 0.266  | 0.519 | 0.527 | 0.530 | 0.515 | 0.184 | 0.178 | 0.233 | 0.021  | 0.122 |       |
| PPL    | 0.026  | 0.013  | -0.002 | -0.028 | -0.041 | -0.073 | -0.075 | -0.040 | -0.071 | -0.022 | -0.032 | 0.205  | 0.392 | 0.458 | 0.439 | 0.500 | 0.133 | 0.118 | 0.195 | -0.013 | 0.101 |       |
| PSCI   | -0.035 | 0.010  | 0.019  | -0.010 | 0.027  | 0.047  | 0.247  | 0.246  | 0.090  | 0.057  | 0.097  | 0.246  | 0.407 | 0.324 | 0.429 | 0.378 | 0.116 | 0.151 | 0.146 | -0.025 | 0.060 |       |
| PSIm   | 0.034  | 0.036  | 0.053  | 0.044  | 0.045  | 0.042  | 0.184  | 0.182  | 0.031  | 0.015  | 0.042  | 0.186  | 0.331 | 0.260 | 0.387 | 0.346 | 0.066 | 0.081 | 0.135 | -0.044 | 0.042 |       |
| RAL    | -0.002 | -0.025 | -0.026 | -0.040 | -0.041 | -0.031 | -0.018 | -0.005 | -0.014 | 0.021  | 0.054  | 0.284  | 0.512 | 0.534 | 0.556 | 0.602 | 0.214 | 0.202 | 0.301 | 0.092  | 0.219 |       |
| RNL    | 0.013  | -0.015 | -0.016 | -0.044 | -0.038 | -0.053 | -0.039 | -0.042 | -0.079 | -0.008 | -0.010 | 0.186  | 0.388 | 0.494 | 0.476 | 0.466 | 0.124 | 0.123 | 0.225 | 0.012  | 0.117 |       |
| ANL    | 0.044  | 0.029  | 0.026  | -0.003 | -0.031 | -0.023 | -0.034 | -0.003 | -0.055 | -0.036 | -0.001 | 0.198  | 0.433 | 0.486 | 0.476 | 0.495 | 0.142 | 0.130 | 0.195 | 0.016  | 0.128 |       |
| CALA   | -0.056 | -0.034 | -0.039 | -0.082 | -0.088 | -0.077 | -0.094 | -0.077 | -0.092 | -0.045 | -0.056 | 0.210  | 0.377 | 0.513 | 0.469 | 0.438 | 0.126 | 0.131 | 0.240 | 0.018  | 0.098 |       |
| CALB   | 0.067  | 0.061  | 0.031  | 0.014  | 0.020  | 0.004  | 0.014  | -0.000 | -0.014 | 0.016  | 0.038  | 0.373  | 0.496 | 0.352 | 0.481 | 0.549 | 0.127 | 0.135 | 0.163 | 0.000  | 0.150 |       |
| CRL    | -0.021 | -0.070 | -0.047 | -0.042 | -0.050 | -0.050 | -0.063 | -0.034 | -0.062 | -0.016 | 0.018  | 0.205  | 0.461 | 0.487 | 0.487 | 0.556 | 0.166 | 0.177 | 0.288 | 0.071  | 0.167 |       |
| MJL    | -0.022 | -0.036 | -0.048 | -0.066 | -0.077 | -0.044 | -0.059 | -0.041 | -0.056 | -0.008 | 0.022  | 0.251  | 0.426 | 0.494 | 0.456 | 0.547 | 0.170 | 0.171 | 0.257 | 0.046  | 0.162 |       |
| MML    | 0.001  | -0.019 | -0.012 | -0.036 | -0.043 | -0.036 | -0.048 | -0.041 | -0.075 | -0.012 | -0.033 | 0.206  | 0.404 | 0.489 | 0.455 | 0.486 | 0.172 | 0.154 | 0.246 | 0.034  | 0.137 |       |
| PFL    | 0.010  | 0.041  | 0.016  | 0.033  | 0.034  | 0.013  | 0.128  | 0.158  | 0.018  | 0.029  | 0.033  | 0.219  | 0.494 | 0.400 | 0.473 | 0.484 | 0.115 | 0.140 | 0.193 | -0.008 | 0.083 |       |
| PPL    | -0.020 | -0.030 | -0.041 | -0.045 | -0.058 | -0.070 | -0.054 | -0.039 | -0.061 | -0.032 | -0.019 | 0.218  | 0.354 | 0.444 | 0.444 | 0.465 | 0.130 | 0.147 | 0.244 | 0.022  | 0.132 |       |
| PSCI   | 0.007  | -0.001 | 0.005  | -0.004 | 0.017  | -0.013 | 0.175  | 0.180  | 0.018  | -0.026 | -0.001 | 0.147  | 0.284 | 0.246 | 0.334 | 0.305 | 0.069 | 0.074 | 0.095 | -0.049 | 0.025 |       |
| PSIm   | 0.007  | 0.018  | 0.027  | 0.020  | 0.046  | 0.034  | 0.203  | 0.197  | 0.018  | -0.001 | 0.021  | 0.167  | 0.381 | 0.315 | 0.358 | 0.354 | 0.074 | 0.071 | 0.127 | -0.043 | 0.042 |       |
| RAL    | -0.041 | -0.008 | -0.011 | -0.053 | -0.061 | -0.059 | -0.038 | -0.012 | -0.052 | 0.009  | 0.029  | 0.274  | 0.448 | 0.526 | 0.476 | 0.572 | 0.179 | 0.163 | 0.251 | 0.072  | 0.172 |       |
| RNL    | 0.042  | 0.016  | -0.008 | -0.028 | -0.027 | -0.034 | -0.041 | -0.009 | -0.048 | -0.010 | 0.003  | 0.197  | 0.440 | 0.466 | 0.464 | 0.500 | 0.158 | 0.155 | 0.246 | 0.049  | 0.144 |       |
| ANL    | 0.007  | -0.020 | -0.036 | -0.041 | -0.054 | -0.056 | -0.046 | -0.033 | -0.047 | -0.033 | 0.016  | 0.220  | 0.405 | 0.470 | 0.493 | 0.532 | 0.166 | 0.162 | 0.257 | 0.033  | 0.170 |       |
| CALA   | -0.036 | -0.025 | -0.050 | -0.048 | -0.077 | -0.077 | -0.035 | -0.042 | -0.068 | -0.029 | -0.020 | 0.214  | 0.453 | 0.505 | 0.517 | 0.487 | 0.140 | 0.135 | 0.234 | 0.035  | 0.136 |       |
| CALB   | 0.009  | 0.004  | -0.007 | -0.015 | -0.000 | -0.022 | 0.012  | -0.010 | -0.016 | 0.010  | 0.042  | 0.384  | 0.518 | 0.393 | 0.476 | 0.516 | 0.126 | 0.138 | 0.171 | 0.026  | 0.164 |       |
| CRL    | -0.051 | -0.053 | -0.062 | -0.077 | -0.088 | -0.071 | -0.060 | -0.052 | -0.075 | -0.043 | -0.009 | 0.245  | 0.418 | 0.509 | 0.474 | 0.522 | 0.166 | 0.149 | 0.224 | 0.058  | 0.167 |       |
| MJL    | 0.060  | 0.045  | 0.027  | 0.009  | -0.020 | -0.016 | -0.015 | -0.030 | -0.038 | 0.004  | 0.028  | 0.207  | 0.395 | 0.351 | 0.424 | 0.542 | 0.182 | 0.172 | 0.251 | 0.056  | 0.138 |       |
| MML    | -0.036 | -0.050 | -0.068 | -0.068 | -0.064 | -0.064 | -0.057 | -0.029 | -0.052 | -0.013 | -0.010 | 0.211  | 0.454 | 0.476 | 0.487 | 0.571 | 0.204 | 0.204 | 0.323 | 0.085  | 0.208 |       |
| PFL    | 0.019  | 0.028  | 0.032  | 0.020  | 0.046  | 0.025  | 0.137  | 0.156  | 0.018  | 0.041  | 0.061  | 0.199  | 0.465 | 0.414 | 0.471 | 0.467 | 0.128 | 0.130 | 0.202 | -0.015 | 0.069 |       |
| PPL    | 0.018  | 0.016  | -0.011 | -0.042 | -0.067 | -0.060 | -0.056 | -0.034 | -0.079 | -0.025 | -0.043 | 0.218  | 0.421 | 0.456 | 0.460 | 0.514 | 0.142 | 0.148 | 0.213 | 0.034  | 0.132 |       |
| PSCI   | 0.057  | 0.033  | 0.065  | 0.045  | 0.033  | 0.053  | 0.193  | 0.200  | 0.039  | -0.014 | 0.028  | 0.172  | 0.334 | 0.254 | 0.399 | 0.372 | 0.085 | 0.080 | 0.115 | -0.038 | 0.062 |       |
| PSIm   | 0.034  | 0.056  | 0.038  | 0.012  | 0.038  | 0.020  | 0.204  | 0.236  | 0.012  | -0.004 | 0.021  | 0.200  | 0.369 | 0.296 | 0.434 | 0.372 | 0.081 | 0.090 | 0.117 | -0.050 | 0.034 |       |
| RAL    | -0.021 | -0.025 | -0.024 | -0.037 | -0.035 | -0.028 | -0.036 | -0.018 | -0.029 | 0.009  | 0.038  | 0.260  | 0.459 | 0.482 | 0.510 | 0.556 | 0.175 | 0.192 | 0.242 | 0.052  | 0.168 |       |
| RNL    | -0.087 | -0.048 | -0.094 | -0.100 | -0.096 | -0.100 | -0.086 | -0.064 | -0.084 | -0.047 | -0.026 | 0.197  | 0.430 | 0.474 | 0.466 | 0.510 | 0.135 | 0.104 | 0.223 | 0.012  | 0.134 |       |

I01: 6.7-6.6 ppm, I02: 6.6-6.5 ppm, I03: 6.5-6.4 ppm, I04: 6.4-6.3 ppm, I05: 6.3-6.2 ppm, I06: 6.2-6.1 ppm, I07: 6.1-6.0 ppm, I08: 6.0-5.9 ppm, I09: 5.9-5.8 ppm, I10: 5.8-5.7 ppm, I11: 5.7-5.6 ppm,  
I12: 5.6-5.5 ppm, I13: 5.5-5.4 ppm, I14: 5.4-5.3 ppm, I15: 5.3-5.2 ppm, I16: 5.2-5.1 ppm, I17: 5.1-5.0 ppm, I18: 5.0-4.9 ppm, I19: 4.9-4.8 ppm, I20: 4.8-4.7 ppm, I21: 4.7-4.6 ppm

Table S2. NMR response pattern for probe lipase from 6.7 – 4.6 ppm

| Lipase | I01    | I02    | I03    | I04    | I05    | I06    | I07    | I08    | I09    | I10    | I11    | I12   | I13   | I14   | I15   | I16   | I17   | I18   | I19   | I20   | I21   |
|--------|--------|--------|--------|--------|--------|--------|--------|--------|--------|--------|--------|-------|-------|-------|-------|-------|-------|-------|-------|-------|-------|
| Probe  | 0.007  | 0.020  | -0.014 | -0.040 | -0.044 | -0.048 | -0.031 | -0.019 | -0.054 | -0.008 | 0.002  | 0.209 | 0.434 | 0.498 | 0.492 | 0.528 | 0.147 | 0.171 | 0.229 | 0.035 | 0.159 |
| Probe  | -0.028 | -0.021 | -0.027 | -0.046 | -0.035 | -0.049 | -0.042 | -0.037 | -0.062 | -0.035 | -0.008 | 0.213 | 0.471 | 0.499 | 0.499 | 0.521 | 0.166 | 0.162 | 0.232 | 0.033 | 0.150 |
| Probe  | -0.012 | -0.033 | -0.054 | -0.078 | -0.063 | -0.065 | -0.082 | -0.048 | -0.061 | -0.025 | 0.000  | 0.187 | 0.421 | 0.472 | 0.484 | 0.485 | 0.157 | 0.144 | 0.261 | 0.023 | 0.136 |

**Factor scores**

Table S3. Factor scores

| Lipase | LD1    | LD2    | LD3    | LD4   | LD5   | LD6   | LD7   | LD8   | LD9   | LD10  | LD11  |
|--------|--------|--------|--------|-------|-------|-------|-------|-------|-------|-------|-------|
| ANL    | -16.84 | 9.69   | 7.72   | 4.19  | -0.69 | 1.43  | 2.61  | 1.52  | 0.70  | 0.05  | -0.51 |
| CALA   | -22.65 | 16.86  | 8.27   | -5.45 | 3.07  | -1.02 | -0.22 | 1.07  | -2.32 | 0.69  | 0.41  |
| CALB   | -13.75 | -47.01 | 4.74   | -0.81 | 0.75  | -0.55 | -1.51 | -0.11 | -2.41 | 0.25  | 0.20  |
| CRL    | -12.05 | 8.40   | -4.49  | -0.49 | 0.82  | 1.43  | 0.95  | 1.99  | -0.77 | 1.29  | -0.33 |
| MJL    | -16.15 | 7.52   | 1.96   | 6.56  | -1.41 | -2.89 | -2.30 | -0.45 | -1.01 | -0.81 | -1.20 |
| MML    | -12.75 | -1.46  | -7.46  | 1.90  | 0.85  | 2.85  | 0.66  | -0.11 | 0.33  | 1.28  | 0.52  |
| PFL    | 22.53  | 5.18   | 0.22   | -1.86 | -4.05 | -2.84 | 1.71  | -2.33 | -0.13 | 1.60  | 0.87  |
| PPL    | -12.10 | 5.26   | 3.36   | 1.33  | 0.74  | 0.34  | -2.32 | -2.86 | 3.36  | 0.57  | 0.85  |
| PSCI   | 66.58  | 3.78   | 0.59   | 1.65  | 4.09  | -1.42 | -0.70 | -0.43 | 0.35  | 2.00  | -2.45 |
| PSIm   | 47.99  | -4.66  | 0.19   | -0.80 | -1.76 | 0.51  | -1.26 | 1.78  | -0.09 | -1.14 | 0.47  |
| RAL    | -11.22 | -2.62  | -7.88  | -1.98 | 3.17  | -2.38 | -0.12 | 0.55  | 0.43  | 0.72  | -1.27 |
| RNL    | -19.20 | 3.39   | -3.53  | -3.65 | -2.76 | 1.88  | -2.25 | 2.05  | 0.62  | -0.07 | -0.35 |
| ANL    | -16.86 | 10.73  | 5.99   | 0.92  | -1.18 | -0.34 | 3.39  | 1.25  | 1.33  | 0.67  | 0.07  |
| CALA   | -21.51 | 17.15  | 8.43   | -4.14 | 4.62  | 1.12  | 0.38  | -1.04 | 0.16  | -1.30 | -1.38 |
| CALB   | -16.17 | -46.99 | 4.36   | 1.01  | -0.45 | -0.71 | 0.42  | -0.48 | 1.34  | 0.02  | -0.16 |
| CRL    | -11.67 | 7.12   | -3.48  | -0.64 | 0.57  | -0.90 | 0.68  | -0.39 | -0.76 | -0.12 | 2.66  |
| MJL    | -17.75 | 4.64   | 0.45   | 5.15  | -3.31 | -0.50 | -1.42 | 0.24  | -0.19 | 0.76  | 1.05  |
| MML    | -15.68 | -1.71  | -8.39  | 0.31  | -0.45 | 2.81  | 1.45  | -2.98 | -1.73 | -0.68 | -0.76 |
| PFL    | 22.89  | 3.33   | 1.23   | -3.91 | -4.52 | -2.44 | 0.23  | -3.10 | 0.12  | -0.81 | 0.35  |
| PPL    | -12.57 | 6.29   | 4.12   | 0.97  | -0.01 | 0.96  | 0.08  | -0.51 | 0.83  | -1.84 | 0.49  |
| PSCI   | 66.62  | 4.67   | 0.38   | 1.97  | 4.29  | 2.58  | -2.65 | -0.36 | -0.05 | -0.00 | 1.08  |
| PSIm   | 49.27  | -5.89  | 1.15   | 0.17  | -3.97 | 1.87  | 1.74  | 1.07  | -1.36 | -0.12 | 0.15  |
| RAL    | -11.46 | -1.30  | -9.47  | -0.62 | 1.28  | -3.87 | -0.28 | 2.61  | 1.90  | -2.18 | -0.33 |
| RNL    | -20.30 | 1.82   | -2.96  | -1.36 | -3.62 | 2.33  | -2.90 | 1.16  | 0.16  | 0.87  | -0.74 |
| ANL    | -17.28 | 8.54   | 5.32   | 3.30  | -1.11 | -0.15 | 2.11  | 0.98  | 1.09  | 0.56  | -0.07 |
| CALA   | -19.58 | 17.37  | 8.15   | -4.35 | 2.00  | -0.00 | -0.52 | -0.75 | -0.97 | -0.11 | -0.19 |
| CALB   | -15.17 | -48.01 | 4.83   | -1.33 | 3.04  | 0.53  | 1.06  | 0.26  | 0.62  | 0.29  | 0.16  |
| CRL    | -11.54 | 4.66   | -4.78  | 0.20  | 2.61  | -1.25 | 0.61  | 1.22  | -1.21 | -0.86 | 1.33  |
| MJL    | -17.02 | 5.09   | 2.15   | 7.18  | -1.75 | -1.79 | -1.19 | 0.24  | -2.28 | -0.33 | -0.53 |
| MML    | -13.40 | -1.55  | -10.91 | 1.32  | 0.43  | 3.13  | 1.94  | -2.18 | -0.54 | -0.42 | -1.00 |
| PFL    | 24.19  | 2.90   | -0.73  | -3.80 | -4.79 | -2.16 | -0.09 | -0.44 | 0.17  | 0.77  | -0.88 |
| PPL    | -13.50 | 6.58   | 1.36   | 1.44  | 1.72  | 1.43  | -1.32 | -1.94 | 0.64  | -0.92 | 0.13  |
| PSCI   | 67.59  | 3.64   | 0.34   | 2.34  | 4.75  | -0.23 | 0.92  | 0.80  | 0.18  | 0.03  | 1.13  |
| PSIm   | 50.14  | -5.86  | 1.72   | -2.35 | -3.87 | 1.62  | 0.92  | 0.98  | 0.38  | -1.98 | -0.81 |
| RAL    | -9.08  | -1.32  | -10.63 | -0.96 | 2.72  | -2.97 | 1.07  | -0.44 | 0.24  | 0.06  | 0.28  |
| RNL    | -20.54 | 3.74   | -2.33  | -3.41 | -1.81 | 1.59  | -1.89 | 1.14  | 0.87  | 1.21  | 0.75  |

Table S4. Predicted lipase and scores for probe lipase

| Lipase | Prediction | LD1    | LD2  | LD3   | LD4   | LD5   | LD6  | LD7   | LD8   | LD9   | LD10  | LD11  |
|--------|------------|--------|------|-------|-------|-------|------|-------|-------|-------|-------|-------|
| Probe  | RNL        | -21.36 | 7.45 | -2.70 | 0.43  | -1.90 | 0.36 | 1.83  | 1.73  | 1.91  | -0.22 | -1.70 |
| Probe  | RNL        | -21.39 | 0.57 | 0.80  | -1.08 | 2.25  | 0.64 | 7.39  | -0.80 | -0.44 | 0.64  | -1.49 |
| Probe  | RNL        | -24.47 | 5.34 | 1.85  | -1.69 | -1.83 | 4.27 | -2.46 | 0.70  | 1.17  | 3.05  | -1.12 |

**Manova tests and cross-validation**

Table S5. Manova tests

| Test             | Df | Residuals | Measure  | Approx. F | Df (num) | Df (den) | Prob>F     |
|------------------|----|-----------|----------|-----------|----------|----------|------------|
| Wilks            | 11 | 24        | 1.64e-12 | 4.32      | 231      | 66.6     | 9e-11***   |
| Pillai           | 11 | 24        | 8.06     | 1.83      | 231      | 154      | 3.4e-05*** |
| Hotelling-Lawley | 11 | 24        | 1639     | 15.5      | 231      | 24       | 7.8e-11*** |
| Roy              | 11 | 24        | 1212     | 808       | 21       | 14       | <2e-16***  |

Table S6. Cross-validation (jackknife) contingency table

| Lipase | ANL | CALA | CALB | CRL | MJL | MML | PFL | PPL | PSCI | PSIm | RAL | RNL |
|--------|-----|------|------|-----|-----|-----|-----|-----|------|------|-----|-----|
| ANL    | 2   | 1    | 0    | 0   | 0   | 0   | 0   | 0   | 0    | 0    | 0   | 0   |
| CALA   | 1   | 0    | 0    | 0   | 0   | 0   | 0   | 1   | 0    | 0    | 0   | 1   |
| CALB   | 0   | 0    | 3    | 0   | 0   | 0   | 0   | 0   | 0    | 0    | 0   | 0   |
| CRL    | 0   | 0    | 0    | 0   | 0   | 1   | 0   | 1   | 0    | 0    | 0   | 1   |
| MJL    | 1   | 0    | 0    | 0   | 0   | 0   | 0   | 1   | 0    | 0    | 1   | 0   |
| MML    | 0   | 0    | 0    | 0   | 0   | 0   | 0   | 0   | 0    | 0    | 2   | 1   |
| PFL    | 0   | 0    | 0    | 0   | 0   | 0   | 3   | 0   | 0    | 0    | 0   | 0   |
| PPL    | 1   | 0    | 0    | 1   | 0   | 0   | 0   | 1   | 0    | 0    | 0   | 0   |
| PSCI   | 0   | 0    | 0    | 0   | 0   | 0   | 0   | 0   | 2    | 1    | 0   | 0   |
| PSIm   | 0   | 0    | 0    | 0   | 0   | 0   | 0   | 0   | 1    | 2    | 0   | 0   |
| RAL    | 0   | 0    | 0    | 0   | 0   | 2   | 0   | 0   | 0    | 0    | 0   | 1   |
| RNL    | 0   | 0    | 0    | 0   | 1   | 0   | 0   | 1   | 0    | 0    | 0   | 1   |

Table S7. Cross-validation results (total = 0.3889)

| ANL    | CALA   | CALB   | CRL    | MJL    | MML    | PFL    | PPL    | PSCI   | PSIm   | RAL    | RNL    |
|--------|--------|--------|--------|--------|--------|--------|--------|--------|--------|--------|--------|
| 0.6667 | 0.0000 | 1.0000 | 0.0000 | 0.0000 | 0.0000 | 1.0000 | 0.3333 | 0.6667 | 0.6667 | 0.0000 | 0.3333 |

### Cross-validation on grouped dataset

Table S8. Cross-validation contingency table, grouped dataset

| Lipase | CALB | LIP | PFL | PSCI | PSIm |
|--------|------|-----|-----|------|------|
| CALB   | 3    | 0   | 0   | 0    | 0    |
| LIP    | 0    | 24  | 0   | 0    | 0    |
| PFL    | 0    | 0   | 3   | 0    | 0    |
| PSCI   | 0    | 0   | 0   | 2    | 1    |
| PSIm   | 0    | 0   | 0   | 0    | 3    |

Table S9. Cross-validation results, grouped dataset (total = 0.9722)

| CALB   | LIP    | PFL    | PSCI   | PSIm   |
|--------|--------|--------|--------|--------|
| 1.0000 | 1.0000 | 1.0000 | 0.6667 | 1.0000 |
